# Supplementary material for: Early phase trial of intracystic injection of large surface area microparticle paclitaxel for treatment of mucinous pancreatic cysts
Source: PubMed Central journal article supplement — Endosc Int Open. 2022 Dec 15;10(12):E1517–25. doi: 10.1055/a-1949-7730 (PMC9754881; doi:10.1055/a-1949-7730), 2022-12-15

**Supplementary Material**

**Supplementary Fig. 1 a** A 3 cm cyst in the body of the pancreas seen on endoscopic ultrasound (EUS). **b** Large surface area microparticle paclitaxel (LSAM-PTX) seen on EUS as hyperechoic foci after EUS-guided fine-needle injection.

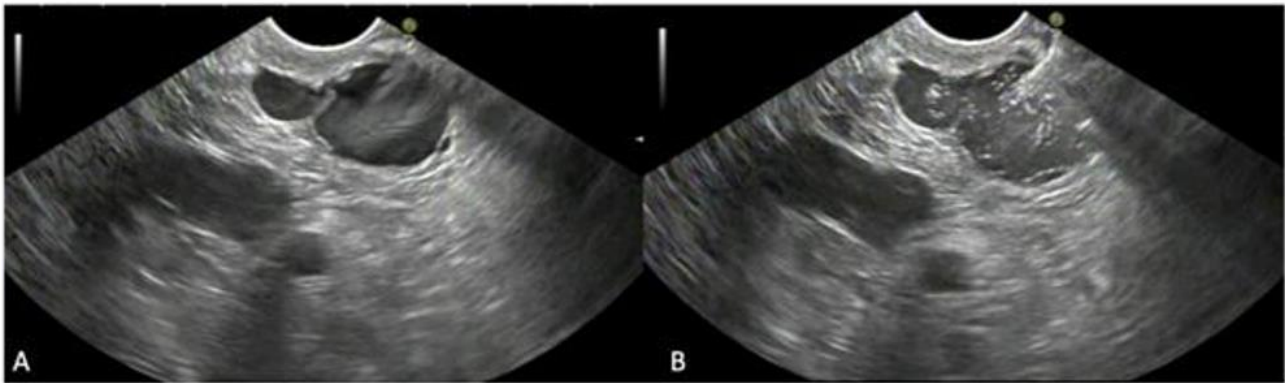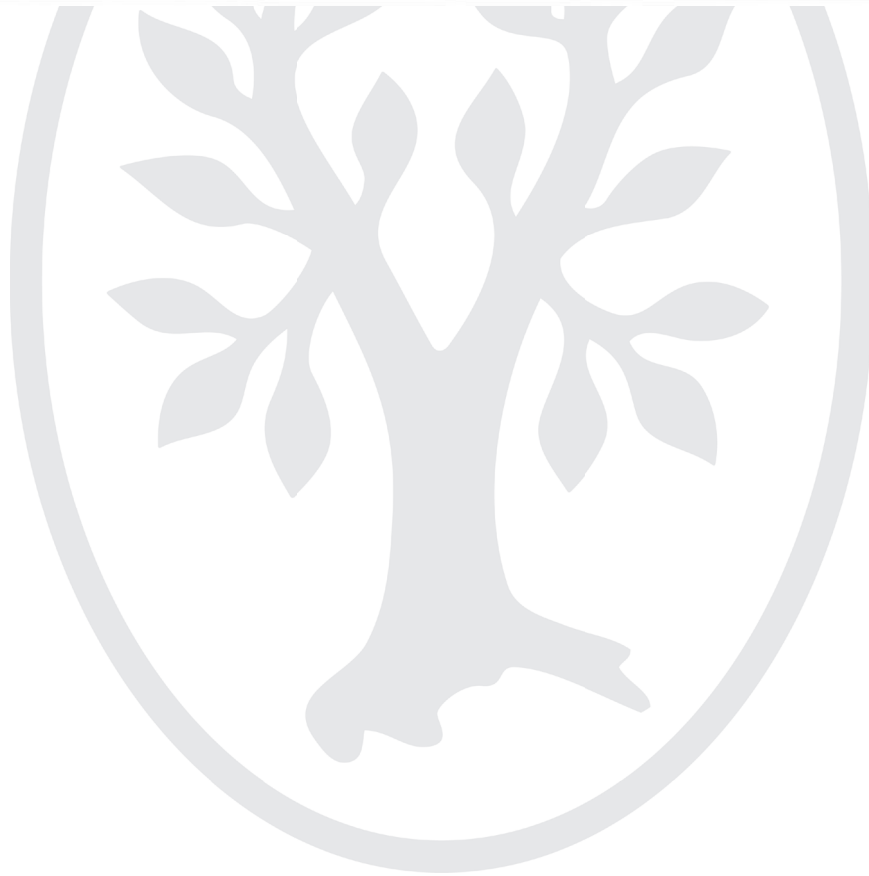

Supplement: 2734supmat_10-1055-a-1949-7730.pdf [file 2734supmat_10-1055-a-1949-7730.pdf]
